# Supplementary material for: Galvanic replacement synthesis of AgxAu1−x@CeO2 (0 ≤ x ≤ 1) core@shell nanospheres with greatly enhanced catalytic performance
Source: Royal Society of Chemistry journal article supplement (doi:10.1039/c5sc02774h), 2015-01-01
Supplement: c5sc02774h1.pdf [file c5sc02774h1.pdf]

**Galvanic Replacement Synthesis of  $\text{Ag}_x\text{Au}_{1-x}@\text{CeO}_2$  ( $0 < x < 1$ )  
Core@Shell Nanospheres with Greatly Enhanced Catalytic  
Performance**

Dapeng Liu,<sup>a</sup> Wang Li,<sup>a</sup> Xilan Feng,<sup>a</sup> and Yu Zhang<sup>\*ab</sup>

<sup>a</sup>*Key Laboratory of Bio-Inspired Smart Interfacial Science and Technology of Ministry of Education, School of Chemistry and Environment, Beihang University, Beijing 100191, China,*

<sup>b</sup>*International Research Institute for Multidisciplinary Science, Beihang University, Beijing 100191, P. R. China*

*Email: jade@buaa.edu.cn*

## Experimental section

### Synthesis of Ag@CeO<sub>2</sub> core@shell nanospheres:

2 mmol of AgNO<sub>3</sub> and 2 mmol of Ce(NO<sub>3</sub>)<sub>3</sub> were dissolved in 10 mL H<sub>2</sub>O. Then 0.84 mL of ammonia (25 %) were added with vigorously stirring. 30 min later, the products were purified by centrifugation and washed with water for three times.

### Synthesis of Ag<sub>x</sub>Au<sub>1-x</sub>@CeO<sub>2</sub> core@shell nanospheres:

1g of NaCl was dissolved in 10 mL of H<sub>2</sub>O first. Then 2 mL of the as-obtained Ag@CeO<sub>2</sub> aqueous dispersion were added. The HAuCl<sub>4</sub> aqueous solution was prepared by diluting a certain amount of HAuCl<sub>4</sub> (0.02 mM) aqueous solution in 50 mL of H<sub>2</sub>O. The replacement reaction is triggered by dropping this HAuCl<sub>4</sub> aqueous solution very slowly. Four hours later, the product was purified by centrifugation with the help of ammonia (25 %).

Different usage of HAuCl<sub>4</sub> caused the structural evolution as well as the different composites. For examples, 1 mL of HAuCl<sub>4</sub> (0.02 mM) aqueous solution can induce the formation of Ag<sub>0.64</sub>Au<sub>0.36</sub>@CeO<sub>2</sub> core@shell nanospheres while 2 mL for Ag<sub>0.41</sub>Au<sub>0.59</sub>@CeO<sub>2</sub>. Additionally, if excess HAuCl<sub>4</sub> was added in the reaction solution, Au@CeO<sub>2</sub> core@shell nanospheres could be obtained.

### Characterization:

The X-ray diffraction patterns of the products were collected on a Rigaku-D/max 2500 V X-ray diffractometer with Cu-K $\alpha$  radiation ( $\lambda = 1.5418 \text{ \AA}$ ), with an operation voltage and current maintained at 40 kV and 40 mA. Transmission electron microscopic (TEM) images were obtained with a TECNAI G2 high-resolution transmission electron microscope operating at 200 kV. XPS measurement was performed on an ESCALAB-MKII 250 photoelectron spectrometer (VG Co.) with Al K $\alpha$  X-ray radiation as the X-ray source for excitation.

### Catalytic test:

#### Chemical Reduction of 4-NP by AB:

The catalytic test was carried out in a quartz cuvette in the UV/vis/NIR spectrophotometer. The aqueous solution of 4-NP ions (0.01 M) was prepared by pre-mixing 4-NP and NaOH together with the molar ratio of 1/1. In addition, AB (0.2 mmol/mL) aqueous solution was also freshly prepared. Typically 0.04 mL of 4-NP and 0.05 mL of AB aqueous solution were mixed in 3 mL of H<sub>2</sub>O. Then 20  $\mu$ L of catalysts were quickly added. The intensity of the absorption peak at 400 nm was monitored by UV-vis spectroscopy along with time.

#### Catalytic CO oxidation:

10 mg of catalysts were mixed with 20 mg of SiO<sub>2</sub> powders. The mixture was put in a stainless steel reaction tube. The experiment was carried out under a flow of reactant gas mixture (1 % CO, 20 % O<sub>2</sub>, balance N<sub>2</sub>) at a rate of 30 mL/min. The composition of the gas was monitored on-line by gas chromatography (GC 9800).

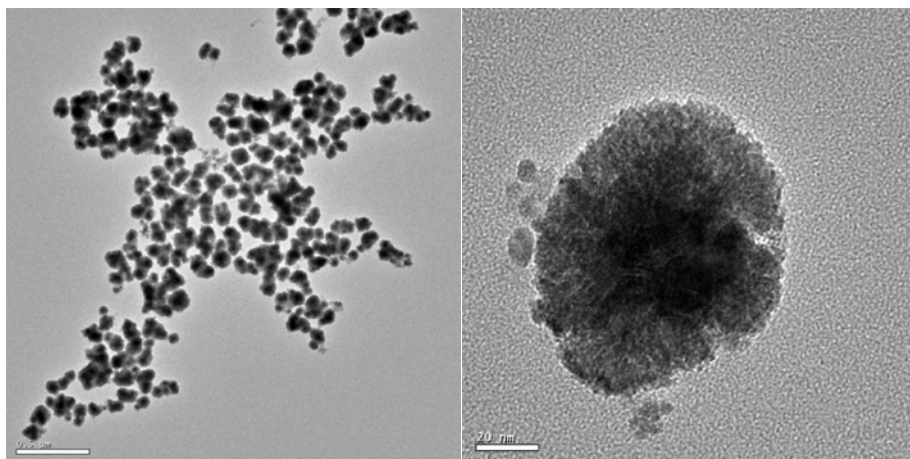

**Figure S1.** TEM images of Ag@CeO<sub>2</sub> core@shell nanospheres.

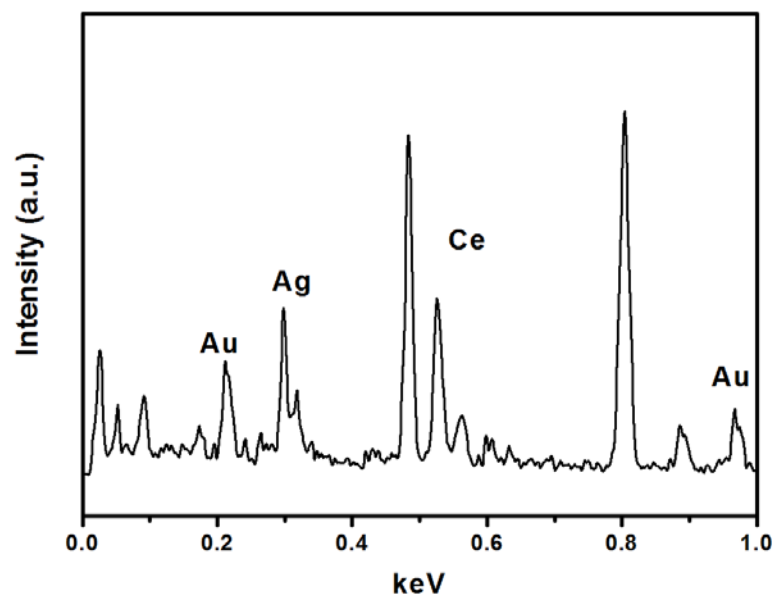

**Figure S2.** EDX spectrum of  $\text{Ag}_{0.64}\text{Au}_{0.36}@\text{CeO}_2$

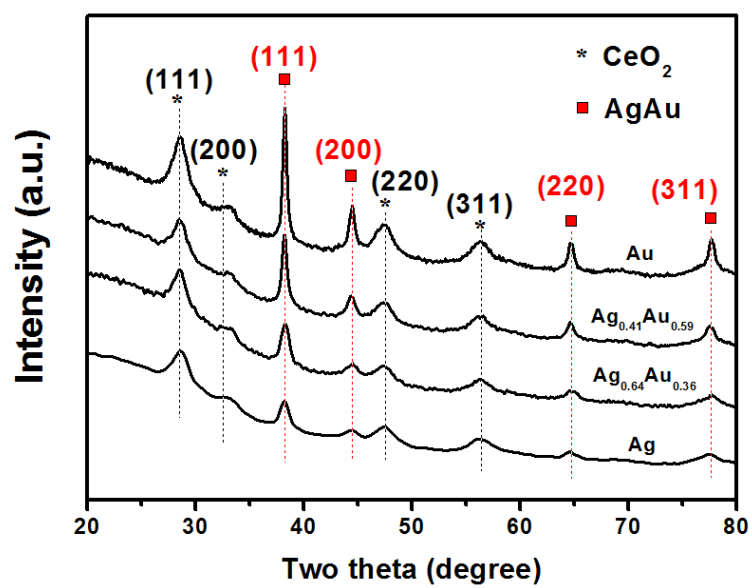

Figure S3. XRD patterns of Ag<sub>x</sub>Au<sub>1-x</sub>@CeO<sub>2</sub> core@shell nanospheres.

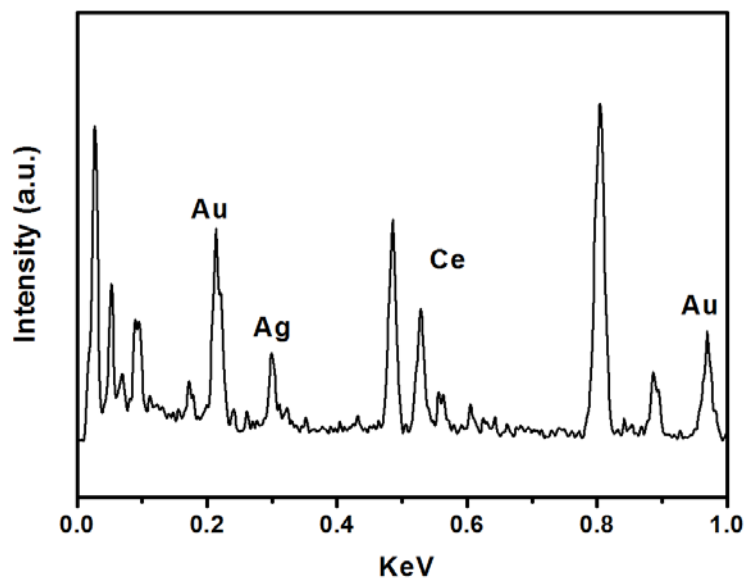

**Figure S4.** EDX spectrum of  $\text{Ag}_{0.41}\text{Au}_{0.59}@ \text{CeO}_2$ .

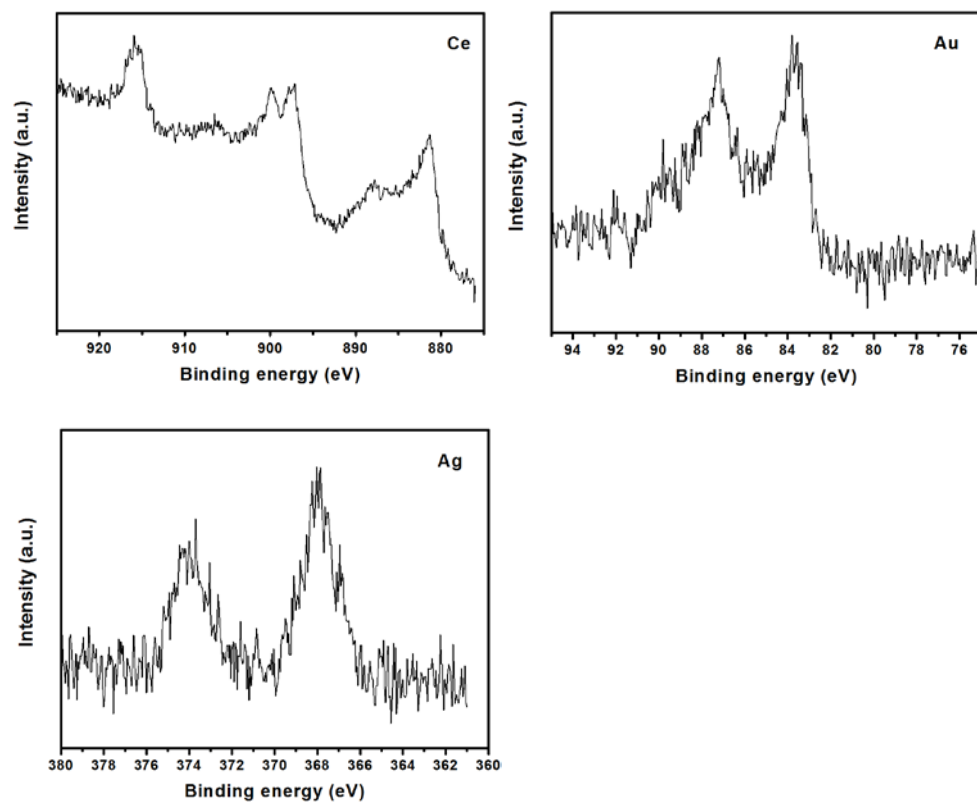

**Figure S5.** XPS spectra of  $\text{Ag}_{0.64}\text{Au}_{0.36}@ \text{CeO}_2$ .

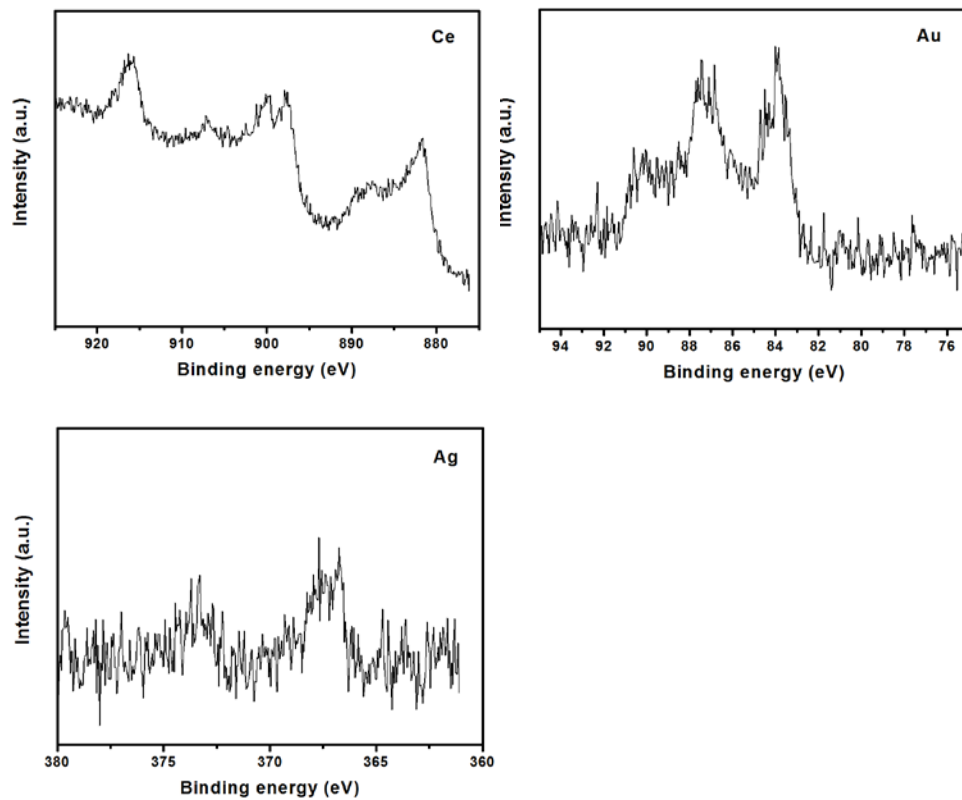

**Figure S6.** XPS spectra of  $\text{Ag}_{0.41}\text{Au}_{0.59}@ \text{CeO}_2$ .



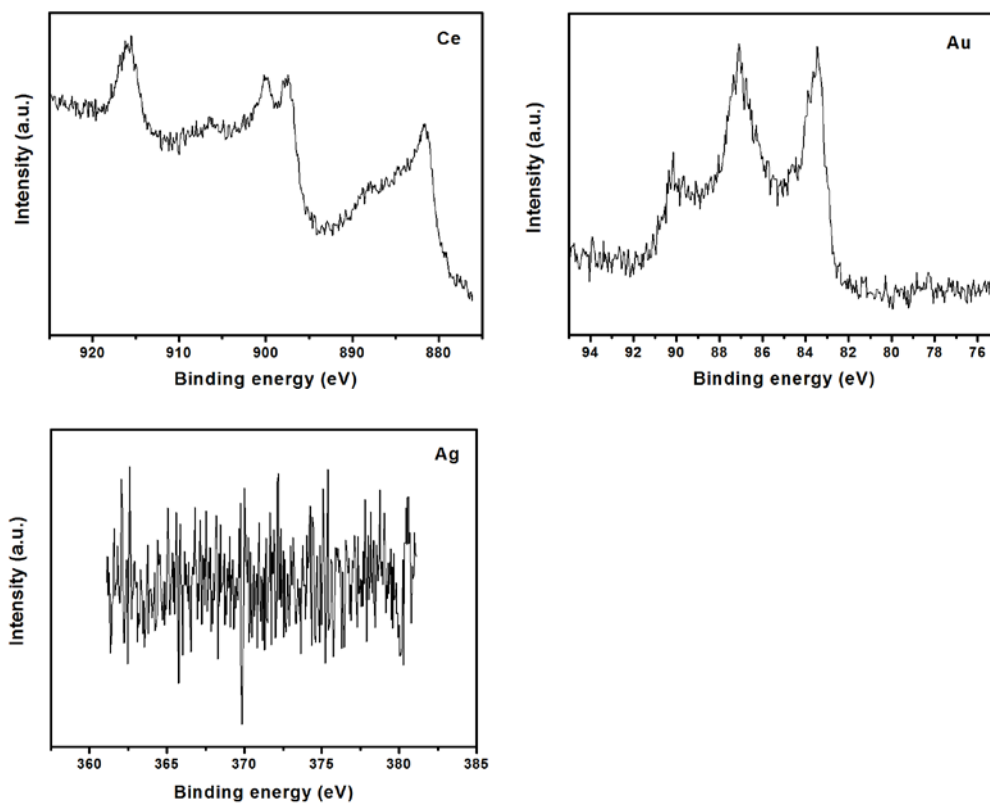

**Figure S7.** XPS spectra of Au@CeO<sub>2</sub>.

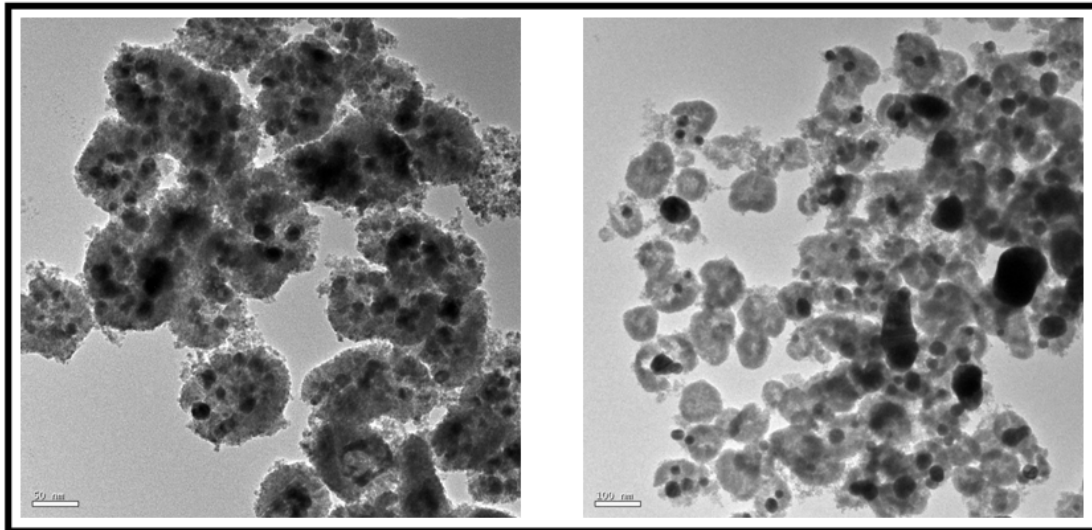

**Figure S8.** TEM images of the as-prepared Ag<sub>x</sub>Au<sub>1-x</sub>@CeO<sub>2</sub> without addition of NaCl in the reaction solution.
